# Supplementary material for: Macroporous chitosan/alginate hydrogels crosslinked with genipin accumulate and retain glioblastoma cancer cells
Source: Royal Society of Chemistry journal article supplement (doi:10.1039/d4ra06197g), 2024-01-01
Supplement: d4ra06197g1.pdf [file d4ra06197g1.pdf]

## Supporting Information

### Macroporous Chitosan/Alginate Hydrogels Crosslinked with Genipin Accumulate and Retain Glioblastoma Cancer Cells

*Lauriane Parès,<sup>a</sup> Sahar Naasri,<sup>b</sup> Lisa Delattre,<sup>a</sup> Hélène Therriault,<sup>b</sup> Benoît Liberelle,<sup>c</sup>  
Gregory De Crescenzo,<sup>c</sup> Marc-Antoine Lauzon,<sup>d</sup> Nathalie Faucheux,<sup>d</sup> Benoit Paquette<sup>b</sup>  
and Nick Virgilio<sup>a</sup>*

<sup>a</sup> Research Center for High Performance Polymer and Composite Systems (CREPEC),  
Department of Chemical Engineering, Polytechnique Montréal, Montréal, Québec, H3C  
3A7, Canada.

<sup>b</sup> Center for Research in Radiotherapy, Department of Nuclear Medicine and Radiobiology,  
Faculty of Medicine and Health Sciences, Université de Sherbrooke, Sherbrooke, Québec,  
J1H 5N4, Canada.

<sup>c</sup> Department of Chemical Engineering, Polytechnique Montréal, Montréal H3C 3A7,  
Québec, Canada.

<sup>d</sup> Department of Chemical and Biotechnological Engineering, Faculty of Engineering,  
Université de Sherbrooke, Sherbrooke, Québec, J1K 2R1, Canada.

**Table S1.** GNP compositions and CHI/GNP ratios in solutions and gels containing 0.75% w/v CHI.

|                 |        |       |        |      |
|-----------------|--------|-------|--------|------|
| GNP (%w/v)      | 0.0125 | 0.025 | 0.0375 | 0.05 |
| CHI / GNP ratio | 60     | 30    | 20     | 15   |

**Table S2.** GNP compositions and CHI/GNP ratios in solutions and gels containing 0.5% w/v CHI.

|                 |       |        |      |       |
|-----------------|-------|--------|------|-------|
| GNP (%w/v)      | 0.025 | 0.0375 | 0.05 | 0.075 |
| CHI / GNP ratio | 20    | 13.33  | 10   | 6.67  |

**Table S3.** Extracted data from microCT analysis for the PS and PLA domains: volume fractions  $\phi$ , average domain sizes  $d$  and specific interfacial area  $S$ .

|                                    |            |            |              |              |              |              |
|------------------------------------|------------|------------|--------------|--------------|--------------|--------------|
| Annealing time (min)               | 5          | 10         | 20           | 30           | 45           | 60           |
| $\phi_{PLA}$                       | 41         | 41         | 49           | 48           | 45           | 49           |
| $\phi_{PS}$                        | 59         | 59         | 50           | 52           | 55           | 52           |
| $d_{PLA}$                          | $12 \pm 2$ | $22 \pm 6$ | $114 \pm 30$ | $187 \pm 63$ | $256 \pm 77$ | $373 \pm 81$ |
| $d_{PS}$                           | $15 \pm 6$ | $21 \pm 4$ | $105 \pm 35$ | $174 \pm 49$ | $259 \pm 60$ | $333 \pm 81$ |
| Specific surface PLA ( $cm^{-1}$ ) | 1531       | 752        | 211          | 92           | 70           | 48           |

**Table S4.** Porous gel mechanical properties in compression: effect of genipin crosslinking before VS after crosslinking with  $CaCl_2$ , ( $N = 4$ )

|                           |               |                |                          |                                       |
|---------------------------|---------------|----------------|--------------------------|---------------------------------------|
|                           | SA 1%         | SA 1% CHI 0.5% | SA 1% CHI 0.5% GNP 0.05% | SA 1% CHI 0.5% GNP 0.05% by diffusion |
| Compression modulus (kPa) | $9.4 \pm 1.4$ | $5.3 \pm 1.6$  | $9.8 \pm 3.1$            | $8.2 \pm 2.2$                         |

**Table S5.** Bulk and porous hydrogels (180  $\mu m$  average pore size) compression modulus (kPa) as a function of SA and CHI contents, at 0.025% w/v GNP content.

|             |                |                 |                |                 |               |
|-------------|----------------|-----------------|----------------|-----------------|---------------|
|             | SA 0.5% CHI 1% | SA 1% CHI 0.25% | SA 1% CHI 0.5% | SA 1% CHI 0.75% | SA 1% CHI 1%  |
| Bulk gels   | $11.5 \pm 1.0$ | $26.3 \pm 9.9$  | $20.5 \pm 8.5$ | $24.3 \pm 9.4$  | Not tested    |
| Porous gels | Can't stand    | $9.9 \pm 1.6$   | $12.6 \pm 2.4$ | $8.7 \pm 2.4$   | $9.8 \pm 2.2$ |

**Table S6.** Compression modulus (kPa) of porous gels (180  $\mu m$  average pore size) as a function of GNP and CHI compositions.

|               |                |                 |               |
|---------------|----------------|-----------------|---------------|
| [GNP] (% w/v) | SA 1% CHI 0.5% | SA 1% CHI 0.75% | SA 1% CHI 1%  |
| 0.025         | $12.5 \pm 2.4$ | $8.7 \pm 2.4$   | $9.8 \pm 2.2$ |
| 0.0375        | $6.6 \pm 2.5$  | $9.5 \pm 3.8$   | $7.3 \pm 1.8$ |
| 0.05          | $9.8 \pm 3.1$  | $10.3 \pm 2.6$  | Not tested    |
| 0.1           | $7.6 \pm 2.0$  | Not tested      | Not tested    |

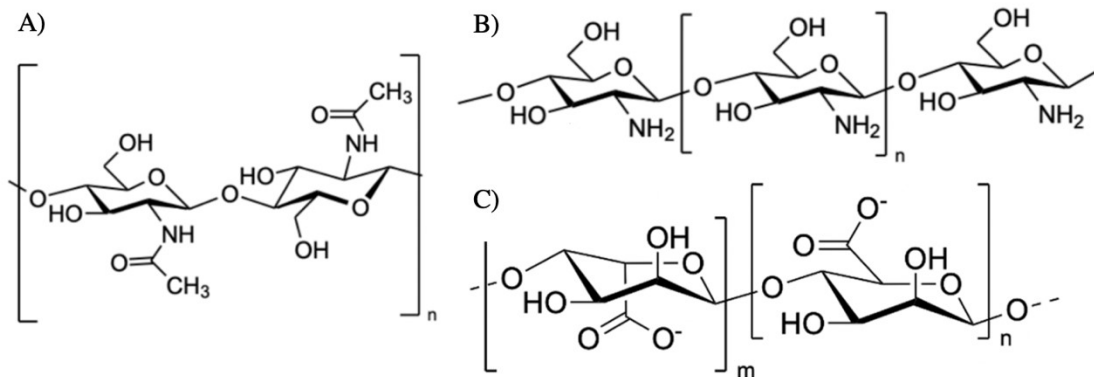

**Figure S1.** Molecular structure of A) chitin B) chitosan and C) sodium alginate.

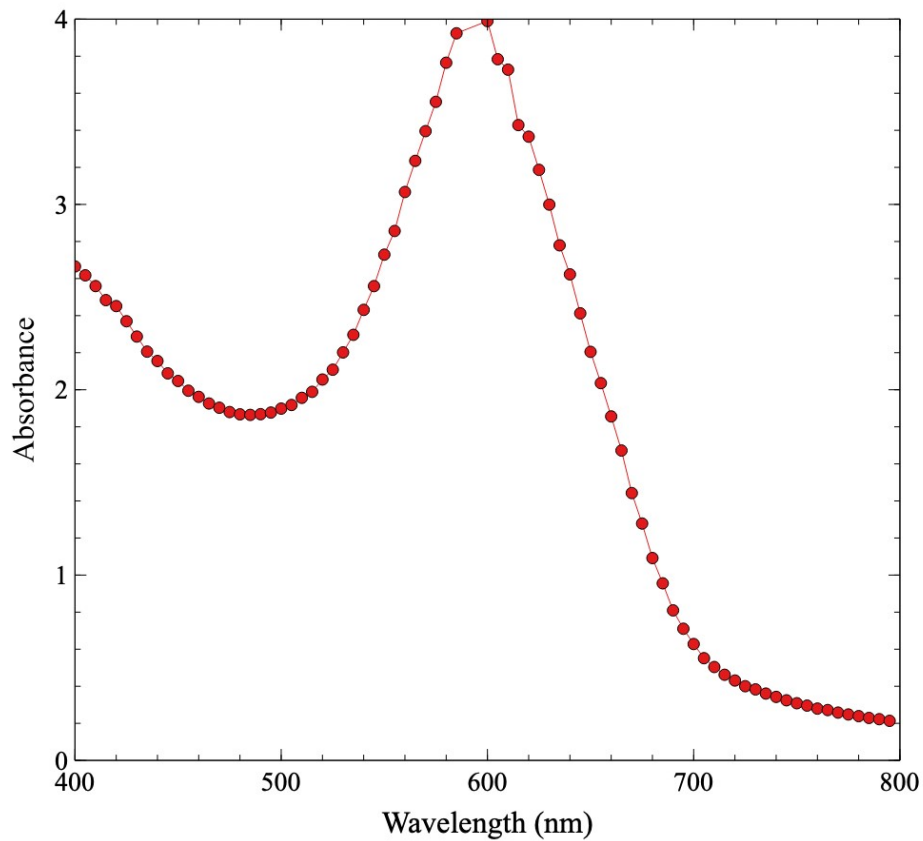

**Figure S2.** Absorbance master curve of CHI 0.75% GNP 0.05% w/v after 24h of gelation time at 37 °C in a plate well.

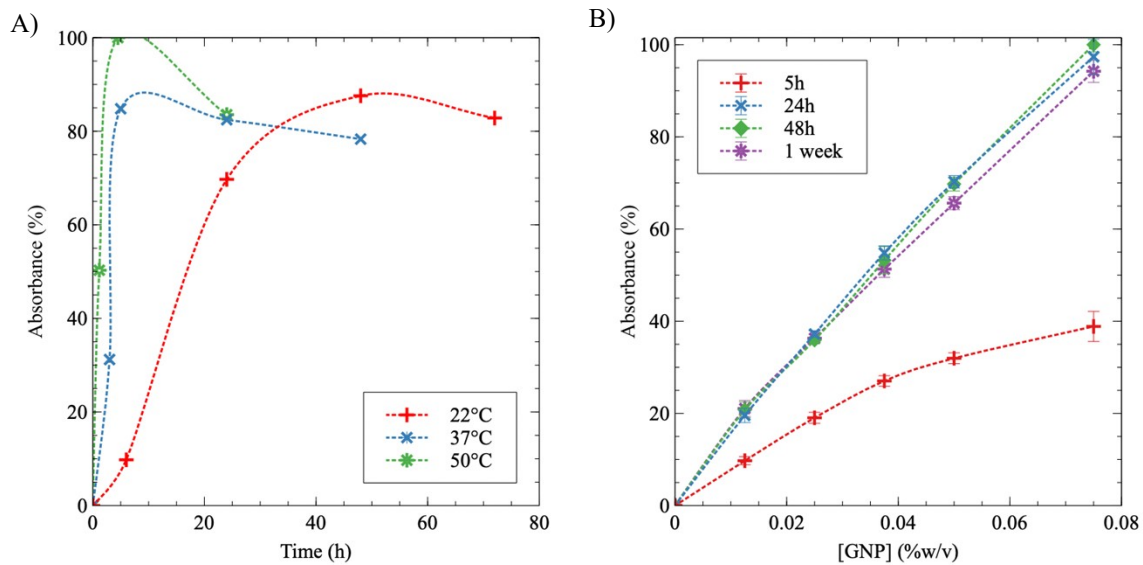

**Figure S3.** Chitosan (CHI) crosslinking kinetics using genipin (GNP) as monitored by UV-Vis spectroscopy. A) Absorbance as a function of time  $t$  and temperature  $T$ , at  $[\text{CHI}] = 0.5\% \text{ w/v}$  and  $[\text{GNP}] = 0.025\% \text{ w/v}$ ; B) Absorbance as a function of time  $t$  and GNP composition, at  $[\text{CHI}] = 0.5\% \text{ w/v}$  and  $37^\circ\text{C}$ .

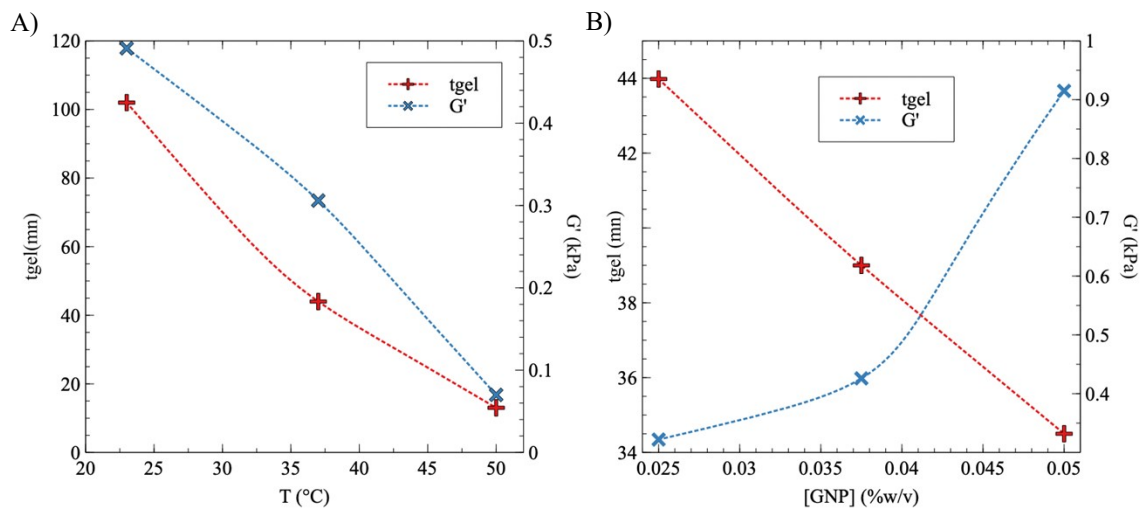

**Figure S4.** A) Gelation time ( $t_{gel}$ ), and storage modulus at equilibrium ( $G'$ ) as a function of temperature  $T$ , for SA 1% CHI 0.5% GNP 0.05% w/v solutions; B) Gelation time ( $t_{gel}$ ) and storage modulus at equilibrium ( $G'$ ) as a function of GNP concentration for SA 1% CHI 0.5% w/v at 37 °C. The decrease in  $G'$  observed in (A) is due to syneresis.

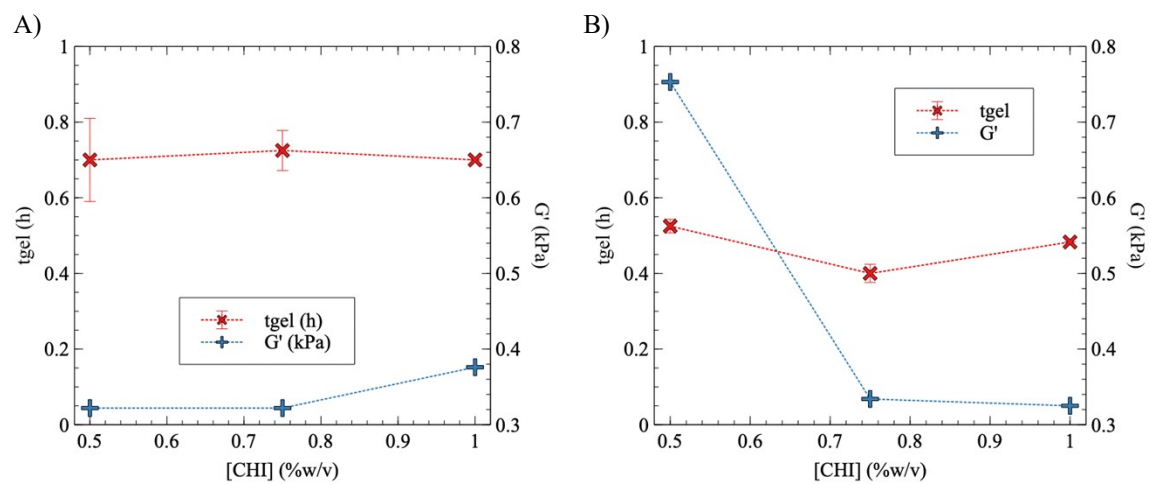

**Figure S5.** Influence of CHI composition on  $t_{gel}$  and final  $G'$  values, at constant SA (1% w/v) content, and at GNP compositions of (A) 0.025% and (B) 0.05% w/v. The decrease in  $G'$  in (B) is due to syneresis.

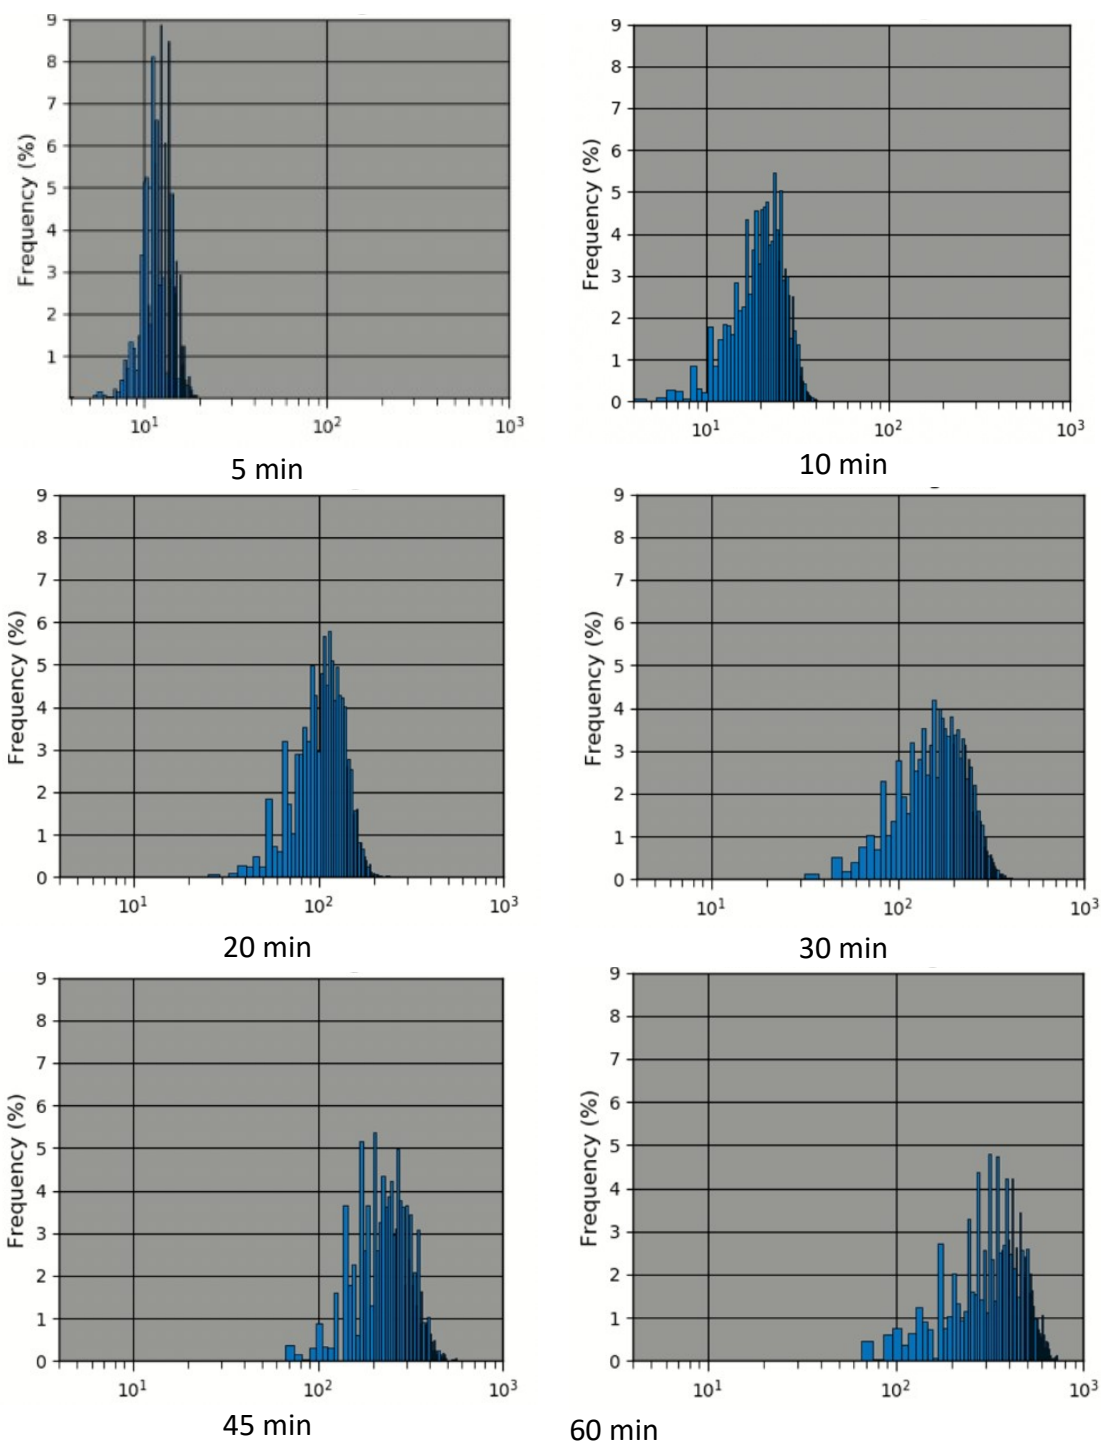

**Figure S6.** Pore size distributions for different annealing times. The  $x$ -axis is in  $\mu\text{m}$ .



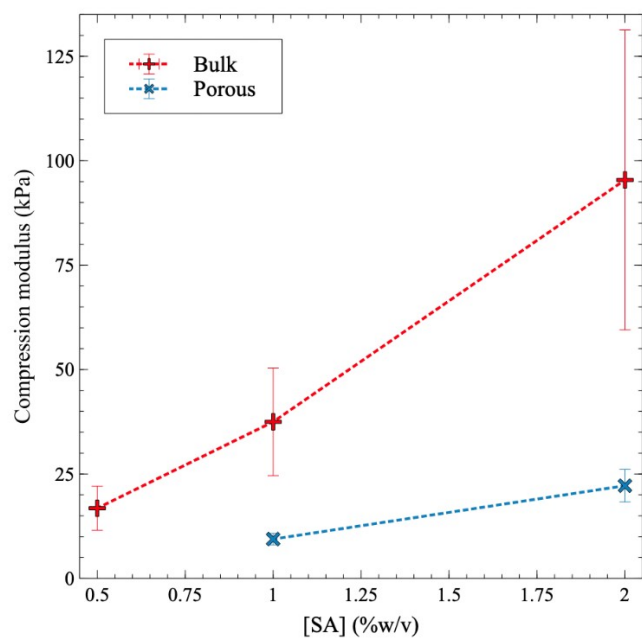

**Figure S7.** Compression modulus of sodium alginate (SA) bulk and porous (pore size = 180  $\mu\text{m}$ ) gels as a function SA composition.

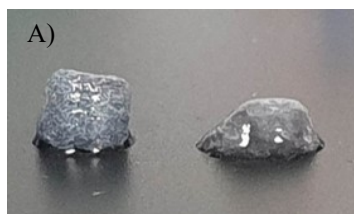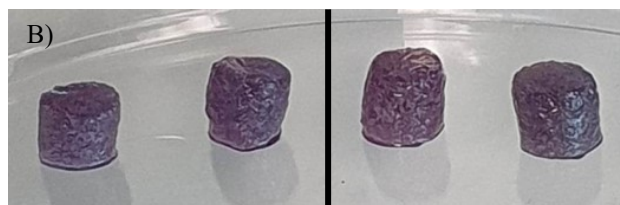

**Figure S8.** SA 1% CHI 0.75% GNP 0.025% w/v (left) and SA1% CHI0.5% GNP0.025% w/v (right) after (A) 1 week in PBS and (B) 2 weeks in DMEM medium.

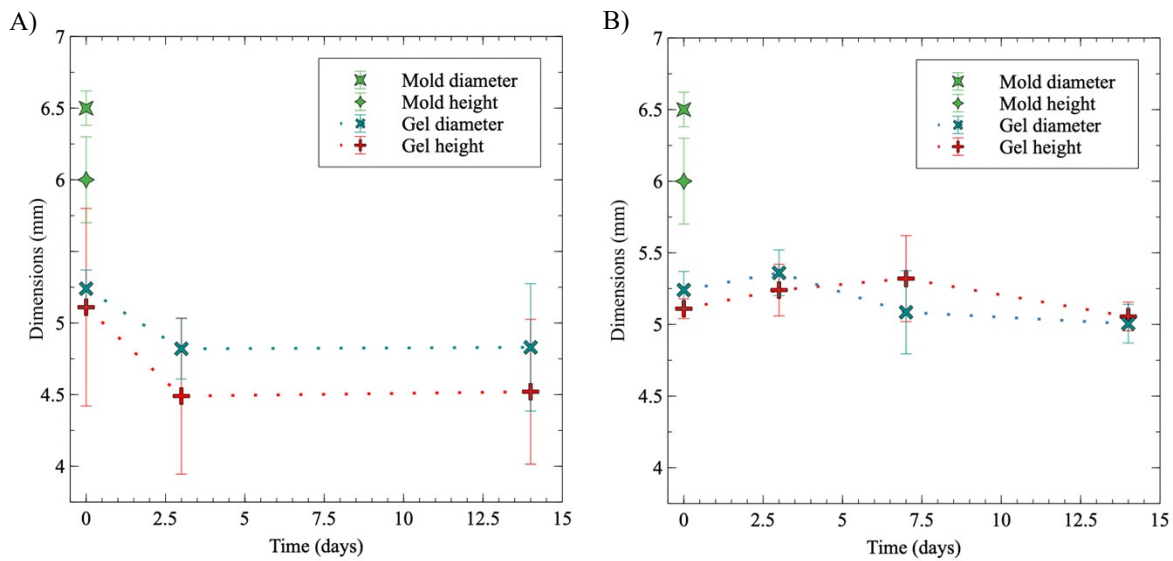

**Figure S9.** Evolution of porous gels dimensions (1% w/v SA, 0.75% w/v CHI, 0.025% w/v GNP, average pore size = 180  $\mu\text{m}$ ) in a) PBS and b) DMEM medium, as a function of time, and compared to the initial PLA molds dimensions.

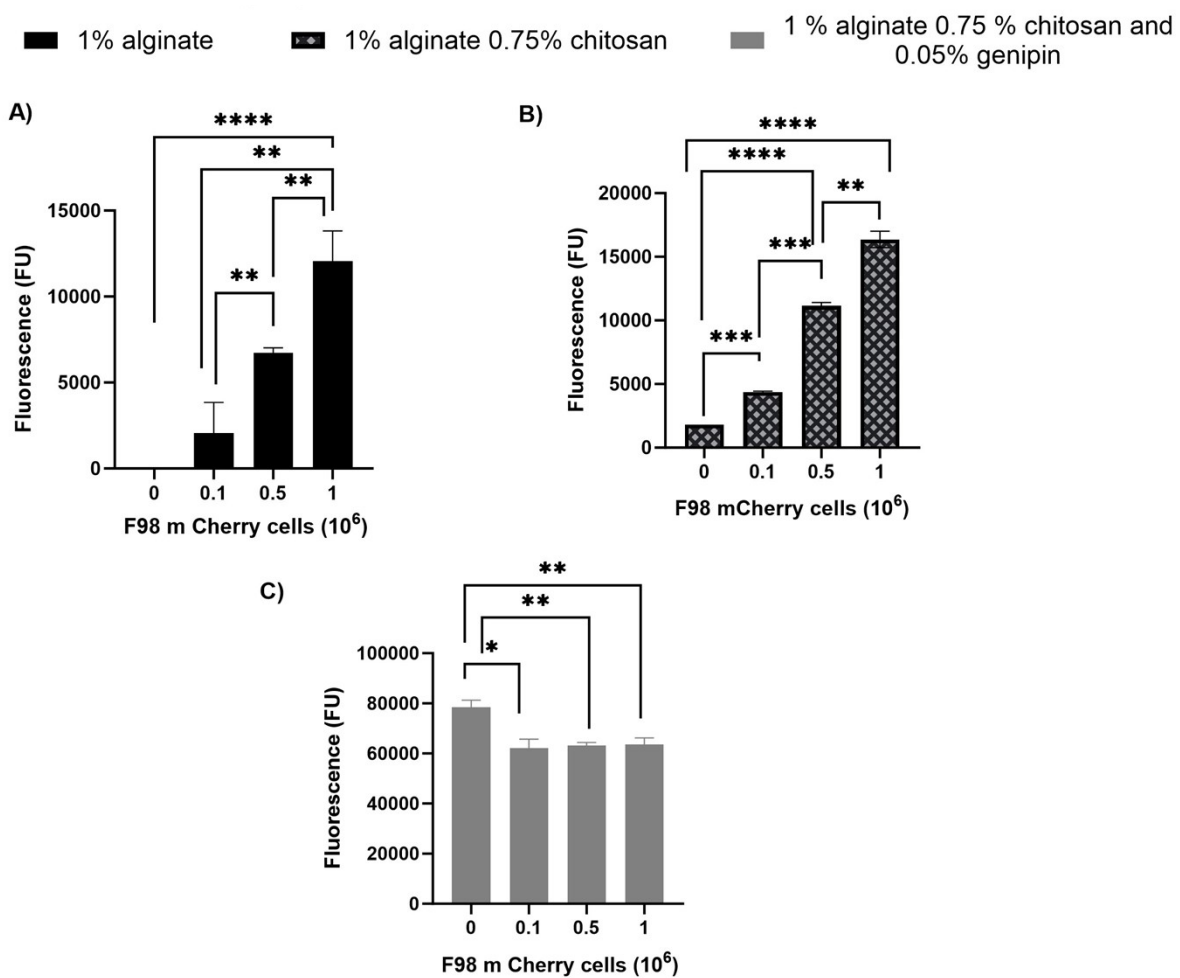

**Figure S10.** F98 mCherry cells fluorescence intensity in SA 1% hydrogels (A), SA 1% CHI 0.75% hydrogels (B), and SA 1% CHI 0.75% GNP 0.05% w/v hydrogels (C).
